# Supplementary material
Source: PubMed Central journal article supplement (PMC8137664)
Supplement: NIHMS1684357-supplement-2.pdf [file NIHMS1684357-supplement-2.pdf]

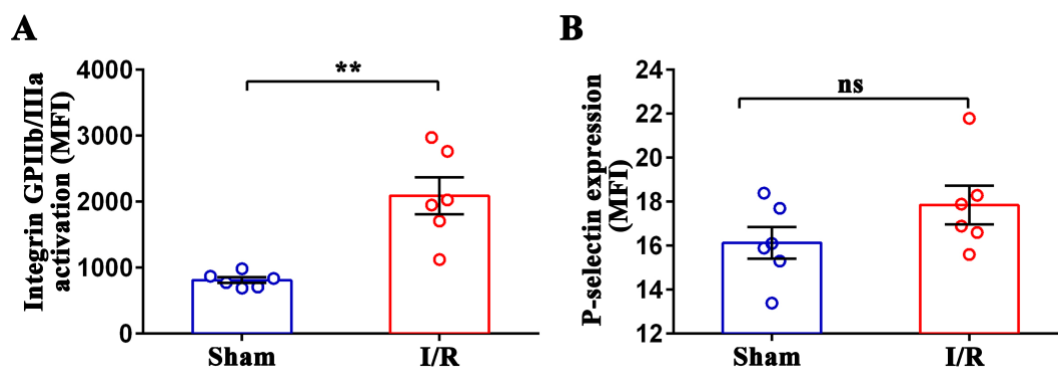

**Supplementary Figure 2.** Activation of platelets under hepatic I/R stress is platelet integrin-dependent but not P-selectin-dependent. (A and B) Flow cytometry analysis of integrin activation and P-selectin expression in platelets derived from mice underwent sham or hepatic I/R. Data are presented as mean  $\pm$  SEM from  $n = 6$  mice per group. ns: not significant,  $**P < 0.01$ .
