# Supplementary material
Source: PubMed Central journal article supplement (PMC8137664)
Supplement: NIHMS1684357-supplement-3.pdf [file NIHMS1684357-supplement-3.pdf]

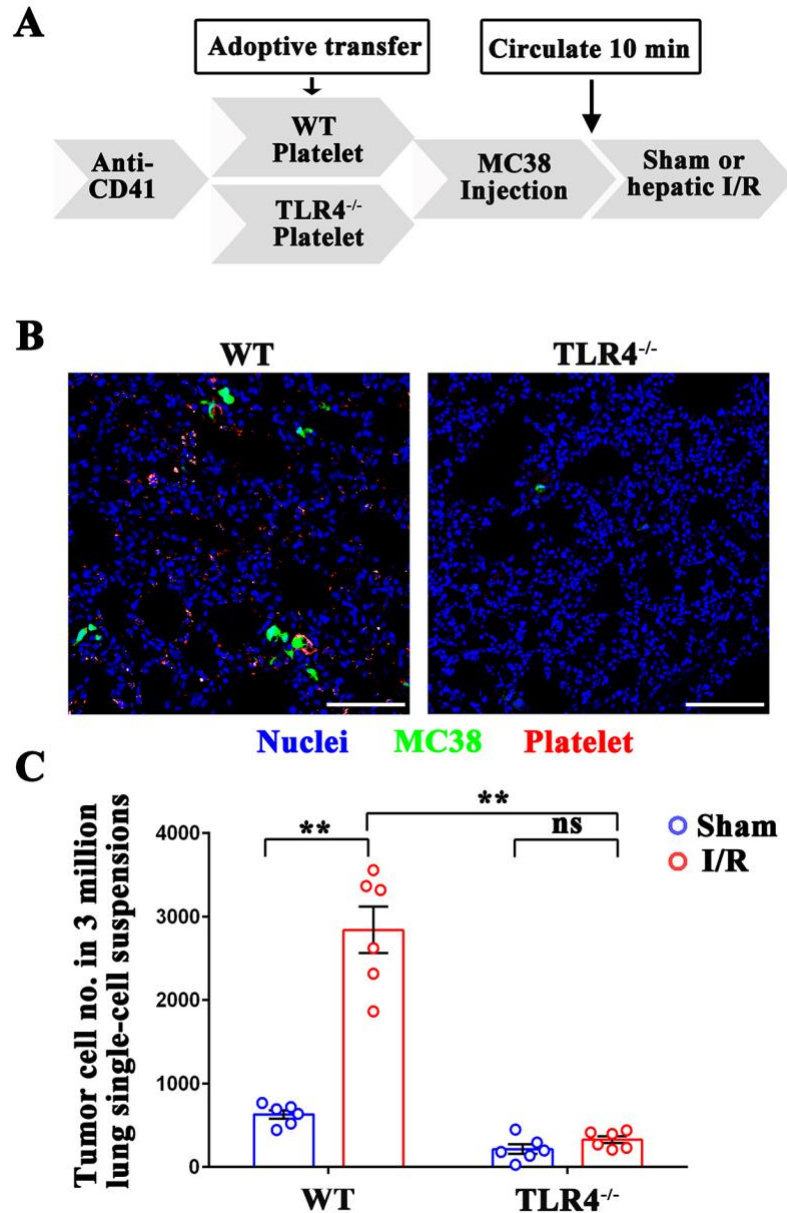

**Supplementary Figure 3.** Adoptive transfer of platelets from TLR4<sup>-/-</sup> mice diminishes surgical stress-induced metastatic colonization. (A) Schematic illustration of the experimental design. (B) Representative immunofluorescence images of confocal microscopy of lung sections showing tumor cells in platelet-depleted-WT mice with adoptive transfer of WT, or TLR4<sup>-/-</sup> platelets at 24 hours following hepatic I/R. Green: MC38; Red: Platelets; Blue: Nuclei. Scale bar, 100 $\mu$ m. (C) FACS quantitative data of MC38 cell numbers in lungs of mice in platelet-depleted-WT mice with adoptive transfer of WT, or TLR4<sup>-/-</sup> platelets at 24 hours following hepatic I/R or sham procedure. Data are presented as mean  $\pm$  SEM from n = 6 mice per group. ns: not significant, \*\* $P$ <0.01.
